# Supplementary material for: Ordered grain boundary reconstruction induces high-efficiency thermoelectric power generation in SnTe
Source: Royal Society of Chemistry journal article supplement (doi:10.1039/d4ee04639k), 2024-01-01
Supplement: d4ee04639k1.pdf [file d4ee04639k1.pdf]

# Electronic supplementary information for

## Ordered Grain Boundary Reconstruction Induces High-Efficiency Thermoelectric Power Generation in SnTe

Qian Deng,<sup>‡,a</sup> Fujie Zhang,<sup>‡,a</sup> Xiaoyu Yang,<sup>‡,b</sup> Ruiheng Li,<sup>a</sup> Chengliang Xia,<sup>c</sup>  
Pengfei Nan,<sup>\*,b</sup> Yue Chen,<sup>c</sup> Binghui Ge,<sup>b</sup> Ran Ang,<sup>\*,a,d</sup> and Jiaqing He,<sup>\*,e,f</sup>

<sup>a</sup>Key Laboratory of Radiation Physics and Technology, Ministry of Education,  
Institute of Nuclear Science and Technology, Sichuan University, Chengdu 610064,  
China

<sup>b</sup>Information Materials and Intelligent Sensing Laboratory of Anhui Province, Leibniz  
International Joint Research Center of Materials Sciences of Anhui Province,  
Institutes of Physical Science and Information Technology, Anhui University, Hefei,  
230601, China

<sup>c</sup>Department of Mechanical Engineering, The University of Hong Kong, Pokfulam  
Road, Hong Kong SAR, China

<sup>d</sup>Institute of New Energy and Low-Carbon Technology, Sichuan University, Chengdu  
610065, China

<sup>e</sup>Shenzhen Key Laboratory of Thermoelectric Materials, Department of Physics,  
Southern University of Science and Technology, Shenzhen 518055, China

<sup>f</sup>Guangdong Provincial Key Laboratory of Advanced Thermoelectric Materials and  
Device Physics, Southern University of Science and Technology, Shenzhen 518055,  
China.

<sup>‡</sup>Q. D., F. Z and X. Y. contributed equally to this work.

\*Correspondence and requests for materials should be addressed to J.Q.H (e-mail:  
hejq@sustech.edu.cn), R.A. (e-mail: rang@scu.edu.cn), and P.F.N. (e-mail:  
npf@ahu.edu.cn).

## Experimental section

### Material characterization and module testing

Thermal conductivity ( $\kappa_t$ ) was calculated as  $\kappa_t = dC_p D$ , where  $D$  is the thermal diffusivity measured by a laser flash technique with the Netzsch LFA467 system, and  $C_p$  is the heat capacity estimated by  $C_p(\text{kJ/mol}) = 3.07 + 4.7(T/\text{K} - 300)/10000$ .<sup>1,2</sup> Ignoring the bipolar thermal conductivity ( $\kappa_{\text{bip}}$ ), lattice thermal conductivity ( $\kappa_l$ ) was directly obtained by subtracting electronic conductivity ( $\kappa_e$ ), calculated using the Wiedemann-Franz relationship,  $\kappa_e = LT/\rho$ , where  $L$  is the Lorentz number.<sup>3</sup>  $L$  was derived using the single parabolic band (SPB) model.<sup>4</sup>

### Electronic band structure calculations

We employed the Korringa-Kohn-Rostoker (KKR) method and the coherent potential approximation (CPA) within the AkaiKKR (Machikaneyama) package to calculate the electronic band structures and densities of states (DOS) of SnTe, SnSb<sub>0.16</sub>Te<sub>1.24</sub>, and Sn<sub>0.88</sub>Mn<sub>0.12</sub>Sb<sub>0.16</sub>Te<sub>1.24</sub>.<sup>5,6</sup> The exchange-correlation energy was parameterized using the Moruzzi, Janak, and Williams form,<sup>7</sup> and spin-orbit interaction was included. Dense meshes with 2858, 4542, and 4242 k-points were utilized for self-consistent calculations of electronic band structure and DOS, respectively. Magnetic calculations were conducted for Sn<sub>0.88</sub>Mn<sub>0.12</sub>Sb<sub>0.16</sub>Te<sub>1.24</sub>. Experimental lattice constants of SnTe, SnSb<sub>0.16</sub>Te<sub>1.24</sub>, and Sn<sub>0.88</sub>Mn<sub>0.12</sub>Sb<sub>0.16</sub>Te<sub>1.24</sub> were used in our calculations: 6.320 Å, 6.278 Å, and 6.239 Å, respectively.

## Modeling study on electronic transport

### The single parabolic (SPB) model<sup>8</sup>

The Seebeck coefficient  $S$ :

$$S = \frac{k_b}{e} \left[ \frac{(r + 5/2)F_{r+3/2}(\eta)}{(r + 3/2)F_{r+1/2}(\eta)} - \eta \right] \quad (S1)$$

where  $\eta$  is the reduced chemical potential,  $k_b$  is the Boltzmann constant,  $e$  is the electron charge, and  $r$  is the scattering factor.

The carrier concentration  $n_H$ :

$$n_H = 4\pi \left[ \frac{2m^* k_B T}{h^2} \right]^{3/2} F_{1/2} \quad (S2)$$

where  $m^*$  is the effective mass of the density of states, accounting for band degeneracy,  $h$  is the Plank constant, and  $T$  is the absolute temperature.

The mobility  $\mu_H$ :

$$\mu_H = \mu_0 \frac{F_{-1/2}}{2F_0} = \frac{\tau_0 e F_{-1/2}}{m^* 2F_0} \quad (S3)$$

where  $\tau_0$  is the relaxation time closely related to the energy in the case of acoustic

phonon scattering:  $\tau_0 = \frac{h^4 C_l}{8\sqrt{2}\pi^3 E_{def}^2 m^* kT^{3/2}}$ .<sup>9</sup> Here,  $C_l$  is a parameter determined by the combination of elastic constants,<sup>10</sup> and  $E_{def}$  is a combination of deformation potentials for multivalley systems.<sup>11</sup>

The Hall factor  $A$ :

$$A = \frac{3}{2} \frac{F_{-1/2}(\eta)}{F_0^2} \quad (S4)$$

The Hall factor reflects the energy scattering mechanism and the anisotropy of the energy band. In the SPB model, anisotropy does not need to be considered.

The Lorenz number  $L$ :

$$L = \frac{\kappa_B^2 3F_0 F_2 - 4F_1^2}{e^2 F_0^2} \quad (S5)$$

In the equations above the integral  $F_j$  is defined by

$$F_j(\eta) = \int_0^{\infty} \frac{\xi^j d\xi}{1 + e^{(\xi - \eta)}} \quad (S6)$$

### The single Kane band (SKB) model

Assuming the light band is nonparabolic and the heavy band is parabolic, the SKB model and SPB model are applied to the light band and heavy band, respectively. It should be noted that the rigid band approximation is adopted, which assumes that changes in carrier concentration only adjust the position of the chemical potential and not the shape or position of the bands.<sup>8</sup>

As for the SKB model:<sup>4,12,13</sup>

The Seebeck coefficient  $S$ :

$$S = \frac{k_B}{e} \left[ \frac{F_{1,-2}^1}{F_{1,-2}^0} - \eta \right] \quad (S7)$$

The carrier concentration  $n_H$ :

$$n_H = \frac{1}{3\pi} \left[ \frac{8m^* k_B T}{h^2} \right]^{3/2} F_{3/2,0}^0 \quad (S8)$$

The mobility  $\mu_H$ :

$$\mu_H = \frac{h^4 e C_{\parallel}}{8\pi^3 m_I^* (2m_b^* k_B T)^{3/2} E_{\text{def}}^2 F_{3/2,0}^0} \quad (S9)$$

Due to the anisotropy of both conduction and valence bands, the inertial effective mass  $m_I^*$  and the density of states effective mass  $m^*$  are governed by the effective band mass of a single pocket along two directions  $m_{\parallel}^*$  and  $m_{\perp}^*$ :<sup>14</sup>

$$m^* = N_V^{2/3} m_b^* = N_V^{2/3} (m_{\perp}^{*2} m_{\parallel}^{*2})^{1/3}; \quad m_I^* = 3 \left( \frac{2}{m_{\perp}^*} + \frac{1}{m_{\parallel}^*} \right)^{-1} \quad (S10)$$

where  $N_V$  is the band degeneracy ( $N_{V1}=4$  for the light-mass valence band,  $N_{V2}=12$  for the heavy-mass valence band of SnTe).<sup>15</sup>

The Hall factor  $A$ :

$$A = \frac{3K(K+2)F_{1/2,-4}^0 F_{3/2,0}^0}{(2K+1)^2 (F_{1,-2}^0)^2} \quad (S11)$$

where  $K = m_{\parallel}^*/m_{\perp}^*$  ( $K=4$ , assumed T independent), which reflects the anisotropy of the energy band.<sup>11</sup>

The Lorenz number  $L$ :

$$L = \left(\frac{k_B}{e}\right)^2 \left[ \frac{F_{1,-2}^2}{F_{1,-2}^0} - \left( \frac{F_{1,-2}^1}{F_{1,-2}^0} \right)^2 \right] \quad (S12)$$

In the equations above the integral  $F_{m,n}^l$  is defined by

$$F_{m,n}^l = \int_0^{\infty} \left( -\frac{\partial f}{\partial \varepsilon} \right) \varepsilon^l (\varepsilon + \beta \varepsilon^2)^m [(1 + 2\beta \varepsilon)^2 + 2]^{1/2} d\varepsilon \quad (S13)$$

where  $\beta = \frac{k_B T}{E_g}$  ( $E_g$  is the band gap) is the reciprocal reduced band gap, and  $\varepsilon$  is the nonparabolicity parameter.

### The two valence bands (TVB) model

It should be noted that the relative positions of the Fermi level and the two valence bands need to be considered when using the TVB model. Specifically, the difference

between the reduced chemical potentials corresponding to the TVB  $\Delta = \frac{\Delta E}{k_B T}$ .<sup>4,13</sup> And the total electrical conductivity:

$$\sigma = \sigma_L + \sigma_{\Sigma} \quad (S14)$$

The total Seebeck coefficient:

$$S = \frac{S_L \sigma_L + S_{\Sigma} \sigma_{\Sigma}}{\sigma_L + \sigma_{\Sigma}} \quad (S15)$$

The total Lorenz number:

$$L = \frac{L_L \sigma_L + L_{\Sigma} \sigma_{\Sigma}}{\sigma_L + \sigma_{\Sigma}} \quad (S16)$$

The total carrier concentration  $n_H$ :

$$n_H = \frac{[bn_{LH} + n_{\Sigma H}]^2}{A_{LH}b^2n_{LH} + A_{\Sigma H}n_{\Sigma H}} \quad (S17)$$

where  $b=4$ , that is suitable for the PbTe/SnTe system.

The total Hall coefficient  $R_H$ :

$$R_H = \frac{\sigma_L^2 R_{LH} + \sigma_{\Sigma}^2 R_{\Sigma H}}{(\sigma_L + \sigma_{\Sigma})^2} \quad (S18)$$

The total Hall mobility  $\mu_H$ :

$$\mu_H = R_H \sigma \quad (S19)$$

## Debye-Callaway Model Simulation

According to the Debye-Callaway model,<sup>16,17</sup>  $\kappa_l$  can be calculated as:

$$\kappa_l = \frac{K_B}{2\pi^2 v} \left( \frac{K_B}{\hbar} \right)^3 \int_0^{\Theta/T} \tau(x) \frac{x^4 e^x}{(e^x - 1)^2} dx \quad (S20)$$

where the integrand combined with the coefficient of the above equation represents the spectral lattice thermal conductivity ( $\kappa_s$ ),<sup>18,19</sup> can be given by:

$$\kappa_s = \frac{k_B}{2\pi^2 v} \left( \frac{k_B}{\hbar} \right)^3 \tau(x) \frac{x^4 e^x}{(e^x - 1)^2} \quad (S21)$$

Here,  $v = 3^{1/3}(v_l^{-3} + 2v_t^{-3})^{-1/3}$  ( $v_l$  and  $v_t$  denote the transverse and longitudinal sound velocities, respectively) is the average speed of phonon,  $x = \hbar\omega/k_B T$  (with  $\omega$  denoting the phonon frequency) represents the reduced phonon frequency,  $\Theta$  is Debye temperature,  $\hbar$  is the reduced Planck constant,  $k_B$  is the Boltzmann constant, and  $\tau_{tot}$  is the total relaxation time defined by Matthiessen's equation as:  $\tau_{tot}^{-1} = \tau_U^{-1} + \tau_N^{-1} + \tau_{PD}^{-1} + \tau_D^{-1} + \tau_{GB}^{-1}$ . The phonon scattering mechanisms include Umklapp (U) phonon scattering, normal process (N), point defects (PD), nanoprecipitates (NP), dislocation (DS), and grain boundaries (GB). The respective phonon relaxation times are given by:

Umklapp and Normal process phonon scattering:

$$\tau_U^{-1} = \frac{\hbar\omega^2 \gamma^2 T}{Mv^2 \Theta} e^{-\Theta/T} \quad (S22)$$

$$\tau_N^{-1} = \beta \tau_U^{-1} \quad (S23)$$

where  $M$  is the average atomic mass,  $\gamma$  is the Grüneisen parameter, and  $\beta$  is the ratio between normal process and Umklapp phonon scattering.

Point defect phonon scattering:

$$\tau_{PD}^{-1} = \frac{V_0}{4\pi^2 v} \Gamma \omega^4 \quad (S24)$$

where  $V_0$  is the average atomic volume, and  $\Gamma$  is the point defect scattering parameter. Disorder scattering parameter  $\Gamma$  are derived from the Slack and Abeles models,

assuming  $\Gamma = \Gamma_M + \Gamma_{S,20,21}$  where the scattering parameters  $\Gamma_M$  and  $\Gamma_S$  are due to mass and strain field fluctuations, respectively. The mass and strain fluctuation scattering parameter is given by:

$$\Gamma_M = \frac{\sum_{i=1}^n c_j (\bar{M}_i / \bar{M})^2 f_i^1 f_i^2 [(M_i^1 - M_i^2) / \bar{M}_i]^2}{\sum_{i=1}^n c_i} \quad (S25)$$

$$\Gamma_S = \frac{\sum_{i=1}^n c_j (\bar{M}_i / \bar{M})^2 f_i^1 f_i^2 \varepsilon [(r_i^1 - r_i^2) / \bar{r}_i]^2}{\sum_{i=1}^n c_i} \quad (S26)$$

where  $n$ ,  $c_j$ ,  $\bar{M}_i$ ,  $\bar{M}$ ,  $M_i^k$ ,  $r_i^k$ ,  $f_i^k$  and  $\varepsilon$  are the number of sublattice, relative degeneracies, average atomic masses, average atomic mass of the compound, atomic mass of the  $k_{th}$  atom of the  $i_{th}$  sublattice, the atomic radius of the  $k_{th}$  atom of  $i_{th}$  sublattice, fractional concentrations of  $k_{th}$  atom of the  $i_{th}$  sublattice, and lattice inharmonic parameter, respectively. In particular, the mass of the Sn vacancy is estimated to be 0, and its radius is 0.5-0.6 times the ionic radius of Sn.

Nanoprecipitates scattering:

$$\tau_p^{-1} = \nu ((2\pi R^2)^{-1} + \left( \frac{4}{9} \pi R^2 \left( \frac{\Delta D}{D} \right)^2 \left( \frac{\omega R}{\nu} \right)^4 \right)^{-1})^{-1} N_p \quad (S27)$$

where  $R$  and  $D$  are the average radius and density of nanoprecipitates, respectively, and  $\Delta D$  is the density difference between the precipitated phase and the matrix material, and  $N_p$  is the density of nanoprecipitates.

Dislocation scattering:

$$\tau_D^{-1} = N_D \frac{V_0^{4/3}}{\nu^2} \omega^3 + 0.06 N_D \gamma^2 B_D^2 \omega \left\{ \frac{1}{2} + \frac{1}{24} \left( \frac{1-2r}{1-r} \right)^2 \left[ 1 + \sqrt{2} \left( \frac{\nu_L}{\nu_T} \right)^2 \right]^2 \right\} \quad (S28)$$

where  $N_D$  is the number of dislocations crossing a unit length,  $B_D$  is the magnitude of the Burgers vector of the dislocation, and  $r$  is the Poisson's ratio.

Grain boundary scattering:



$$\tau_{GB}^{-1} = \frac{v_s}{l} \quad (\text{S29})$$

where  $v_s$  is the average sound velocity, and  $l$  is the average grain size in the material.

## Prediction of conversion efficiency

Based on the Seebeck effect, when there is a temperature difference  $\Delta T = T_h - T_c$  between the upper and lower ends of the thermoelectric device at  $T_h$  and  $T_c$ , the open circuit voltage  $V_{oc}$  generated in the circuit is given by:

$$V_{oc} = \int_{T_c}^{T_h} S_{pn}(T) dT = S_{pn}(T)(T_h - T_c) \quad (S30)$$

where  $S_{pn}$  is the average Seebeck coefficient of a pair of  $p/n$ -materials, estimated as  $S_p - S_n$ .<sup>22</sup>

Ignoring the surface effects of each unit of the device, the internal resistance  $R_{in}$  of the device can be approximated as the sum of the resistance values of the thermoelectric materials:

$$R = N(R_p + R_n) = N \left( \int_0^H \frac{\rho_p(T)}{A_p} dx + \int_0^H \frac{\rho_n(T)}{A_n} dx \right) \quad (S31)$$

where  $N$  is the number of couples,  $H$  is the height of the thermoelectric legs,  $A_p$  is the cross-sectional area of the  $p$ -type leg,  $A_n$  is cross-sectional area of the  $n$ -type leg,  $\rho_p$  is the resistivity of the  $p$ -type material, and  $\rho_n$  is the resistivity of the  $n$ -type material.

Assuming the device load resistance  $R_{out}$ , the effective output voltage  $V_{out}$  and loop current of the device are respectively:

$$V_{out} = \frac{V_{oc}}{R + R_{out}} R_{out} \quad (S32)$$

$$I = \frac{V_{oc}}{R + R_{out}} \quad (S33)$$

The output power  $P$  is given by:

$$P = V_{out} I = \frac{S_{pn}^2(T)(T_h - T_c)^2 R_{out}}{(R + R_{out})^2} \quad (S34)$$

The maximum output power  $P_{max}$  occurs when the internal resistance of the thermoelectric device equals the resistance of the load:

$$P_{max} = \frac{S_{pn}^2(T_h - T_c)^2}{4R} \quad (S35)$$

The open-circuit heat-flow  $Q_{oc}$  of the module is:

$$Q_{oc} = N \left( \frac{A_p}{H} \bar{\kappa}_p + \frac{A_n}{H} \bar{\kappa}_n \right) \Delta T \quad (\text{S36})$$

where  $\kappa_p$  and  $\kappa_n$  are the average thermal conductivity of the  $p$ -type and  $n$ -type materials, respectively.

The input heat at the hot-side  $Q_{in}$  of the module is:

$$Q_{in} = Q_{oc} - \frac{R_{out} I^2 + N(\beta_p - \beta_n) T_h I}{2} + N[S_p(T_h) - S_n(T_h)] T_h I \quad (\text{S37})$$

$$\beta_p = \frac{T_c}{T_h} [\bar{S}_p - S_p(T_c)] + [S_p(T_h) - \bar{S}_p] \quad (\text{S38})$$

$$\beta_n = \frac{T_c}{T_h} [S_n(T_c) - \bar{S}_n] + [\bar{S}_n - S_n(T_h)] \quad (\text{S39})$$

where  $\beta_p$  and  $\beta_n$  are the combined coefficient of  $p$ -type and  $n$ -type materials, respectively. The conversion efficiency  $\eta$  of the module can be estimated by:

$$\eta = \frac{P}{Q_{in}} \quad (\text{S40})$$

## Supplementary Figures

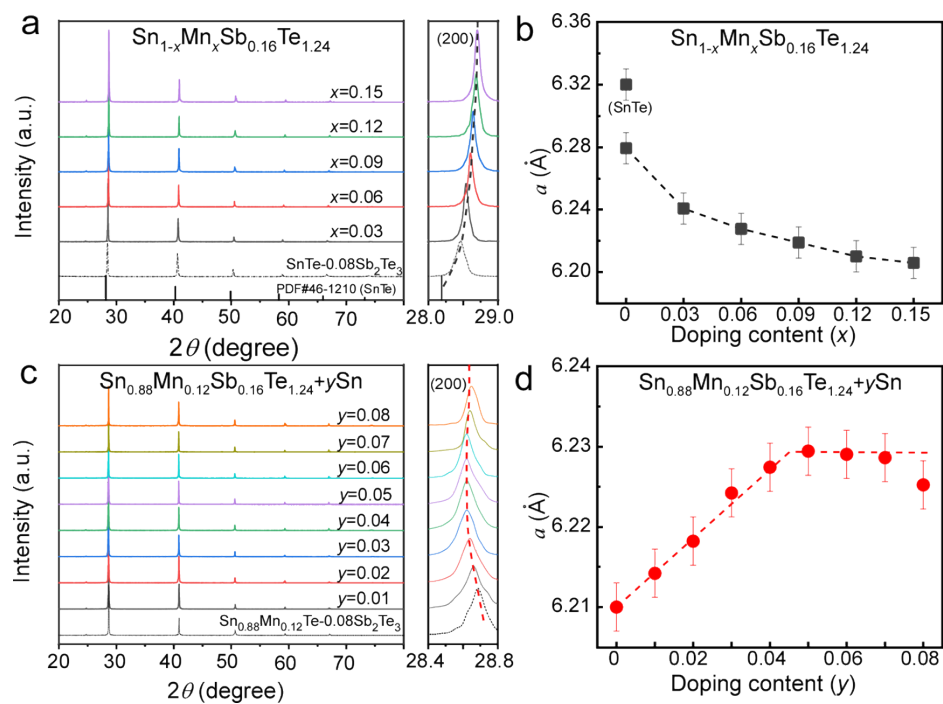

**Fig. S1** Powder XRD patterns for (a)  $\text{Sn}_{1-x}\text{Mn}_x\text{Sb}_{0.16}\text{Te}_{1.24}$  and (c)  $\text{Sn}_{0.88}\text{Mn}_{0.12}\text{Sb}_{0.16}\text{Te}_{1.24+y}\text{Sn}$ , with an enlarged view of the (200) Bragg peak showing the shift. Variation of the lattice parameter  $a$  with doping levels (b)  $x$  and (d)  $y$ .

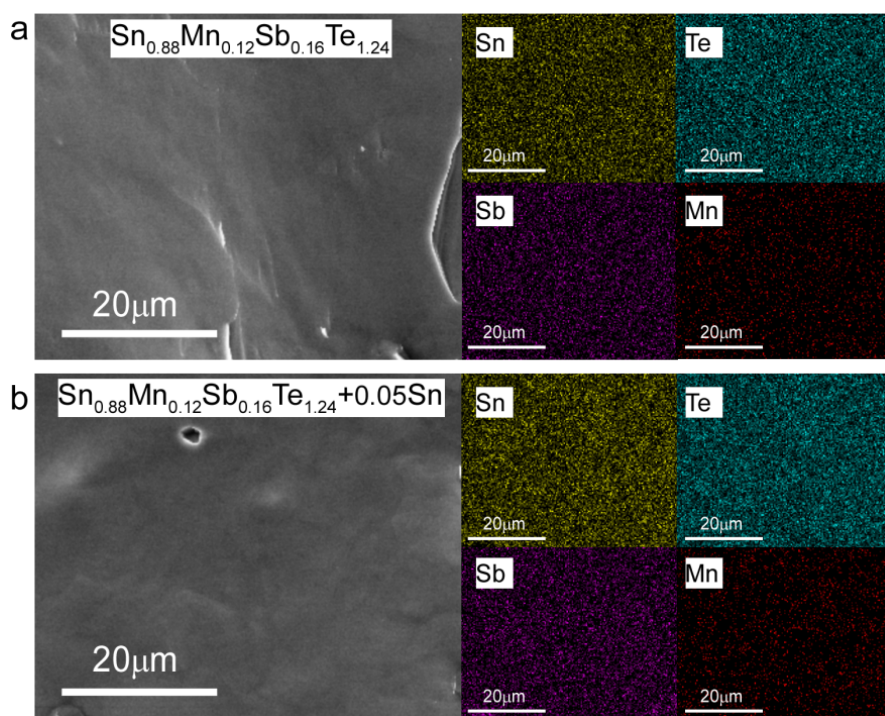

**Fig. S2** Fracture SEM images and corresponding EDS elemental mappings of (a)  $\text{Sn}_{0.88}\text{Mn}_{0.12}\text{Sb}_{0.16}\text{Te}_{1.24}$  and (b)  $\text{Sn}_{0.88}\text{Mn}_{0.12}\text{Sb}_{0.16}\text{Te}_{1.24}+0.05\text{Sn}$ .

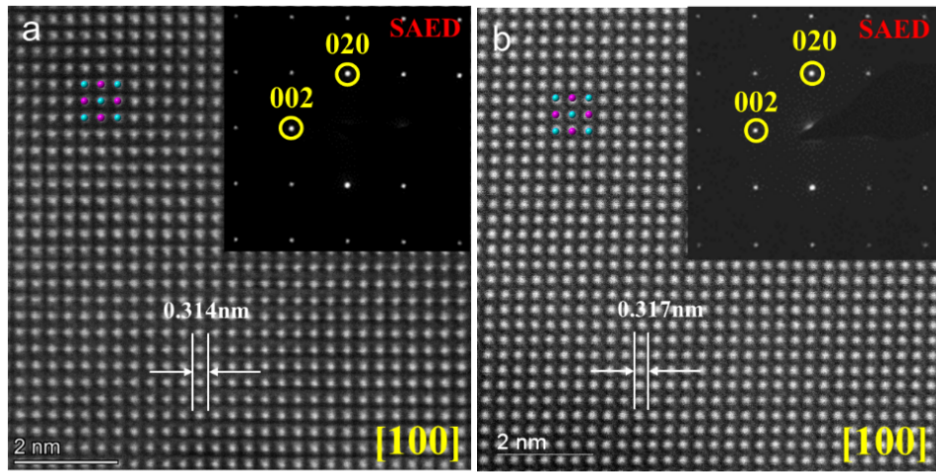

**Fig. S3** Atomic resolution HADDF-STEM images of the uniform matrix for (a)  $\text{Sn}_{0.88}\text{Mn}_{0.12}\text{Sb}_{0.16}\text{Te}_{1.24}$  and (b)  $\text{Sn}_{0.88}\text{Mn}_{0.12}\text{Sb}_{0.16}\text{Te}_{1.24}+0.05\text{Sn}$ . The insets show selected area electron diffraction (SAED) patterns of the corresponding regions.

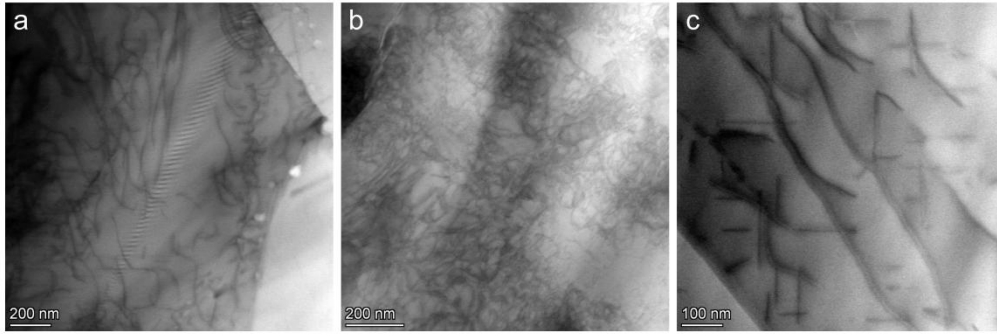

**Fig. S4** Densed dislocations were uniformly distributed throughout the  $\text{Sn}_{0.88}\text{Mn}_{0.12}\text{Sb}_{0.16}\text{Te}_{1.24}$  sample.

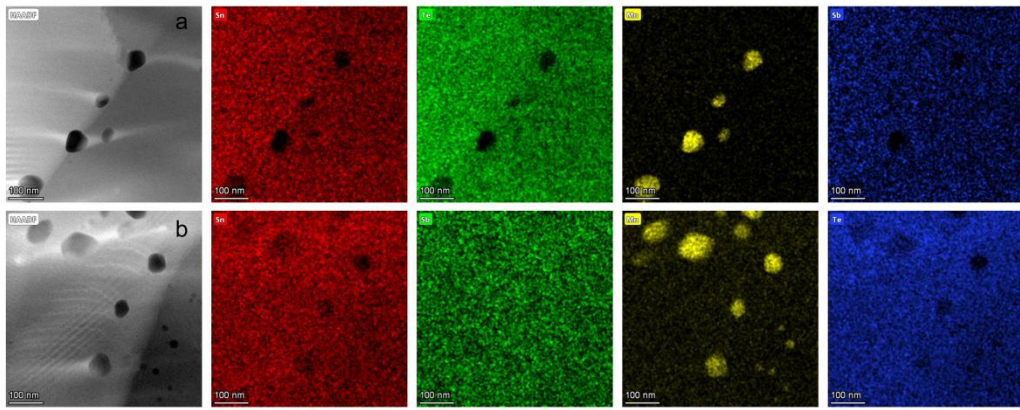

**Fig. S5** HAADF-STEM images and corresponding EDS mapping of representative nanoprecipitates on the grain boundaries of the  $\text{Sn}_{0.88}\text{Mn}_{0.12}\text{Sb}_{0.16}\text{Te}_{1.24}+0.05\text{Sn}$  sample.



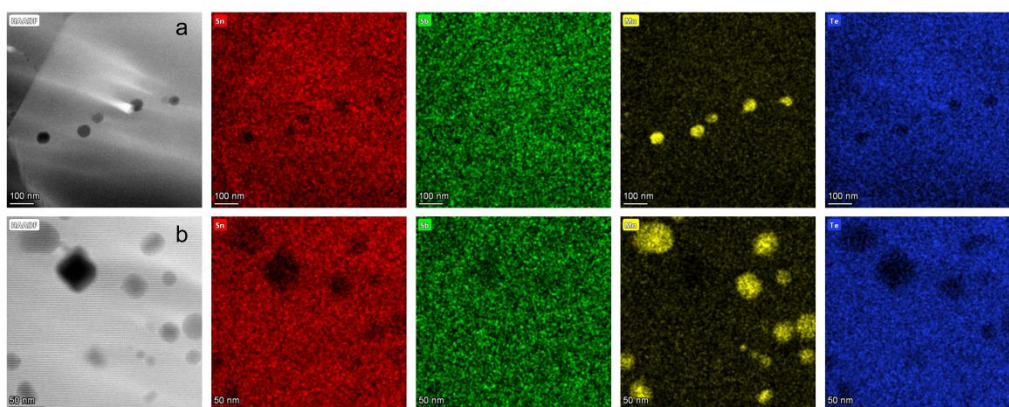

**Fig. S6** HAADF-STEM image and corresponding EDS mapping of representative nanoprecipitates in the matrix of the  $\text{Sn}_{0.88}\text{Mn}_{0.12}\text{Sb}_{0.16}\text{Te}_{1.24}$  sample.

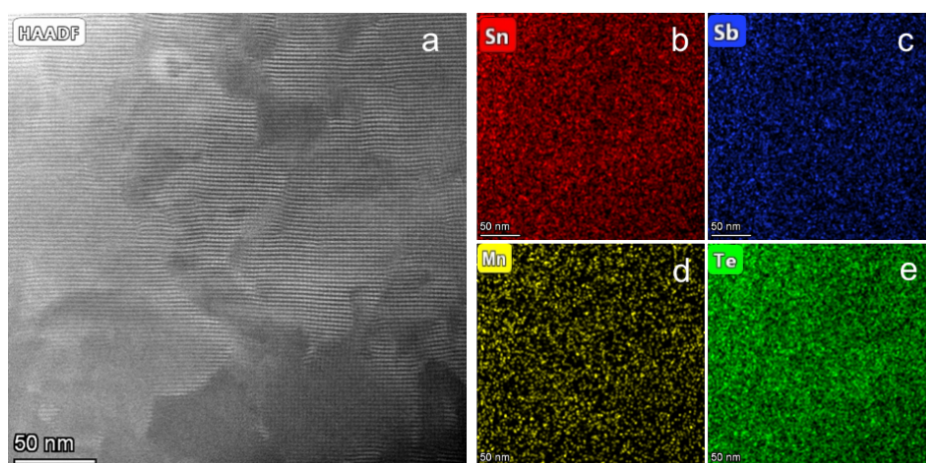

**Fig. S7** (a) High-magnification HAADF-STEM image showing dense dislocations. (b–e) EDS mappings taken from (a).

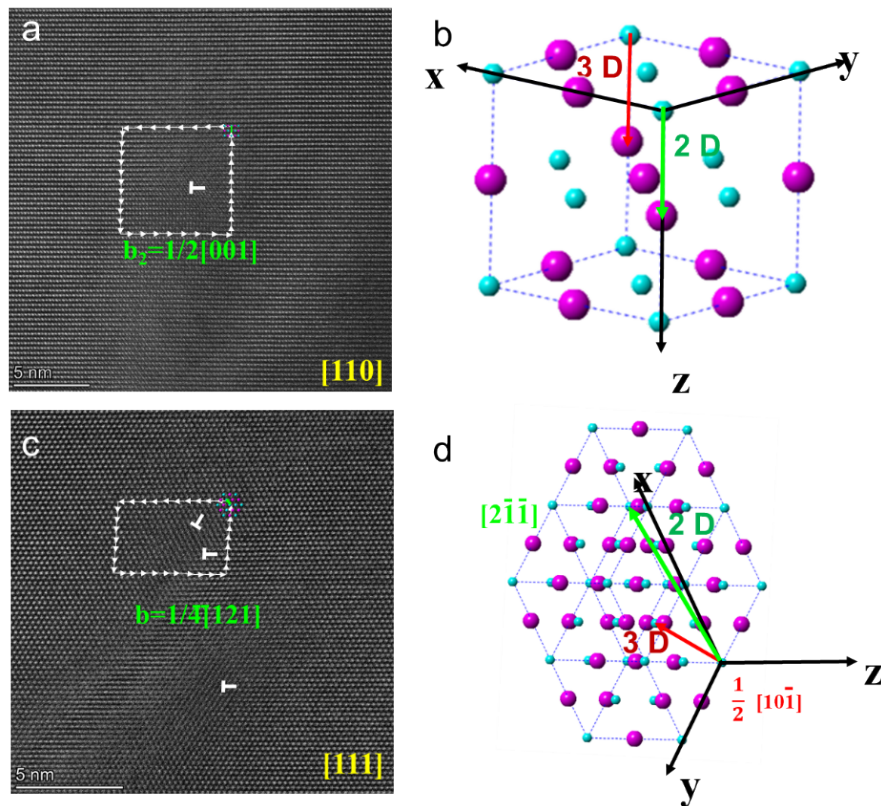

**Fig. S8** Atomic resolution HAADF-STEM images showing the disappearance region of dislocation lines under (a)  $[110]$  and (c)  $[111]$  orientations, with the projected Burgers vector of the dislocation obtained by drawing the Burgers loop. (b, d) Two-dimensional projected Burgers vector of the  $[100]$  orientation corresponding to the three-dimensional  $1/2[110]$  direction in space.

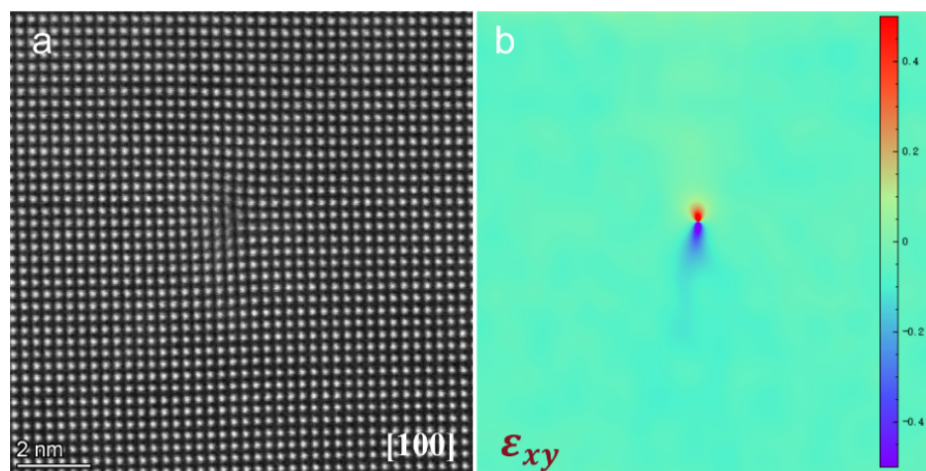

**Fig. S9** (a) High-resolution HADDF-STEM image of a typical edge dislocation, and (b) corresponding GPA strain analysis.

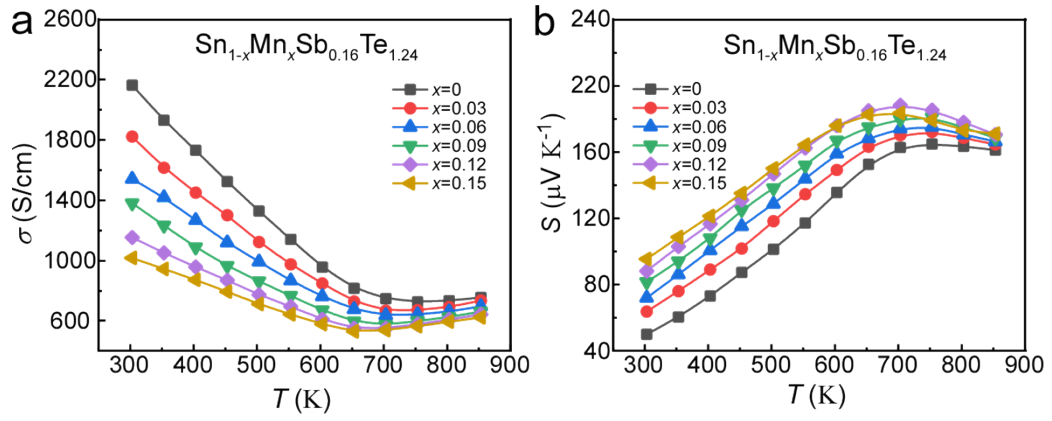

**Fig. S10** (a) Temperature-dependent electrical conductivity  $\sigma$ , (b) Seebeck coefficient  $S$  for  $\text{Sn}_{1-x}\text{Mn}_x\text{Sb}_{0.16}\text{Te}_{1.24}$  ( $x=0-0.15$ ) samples.

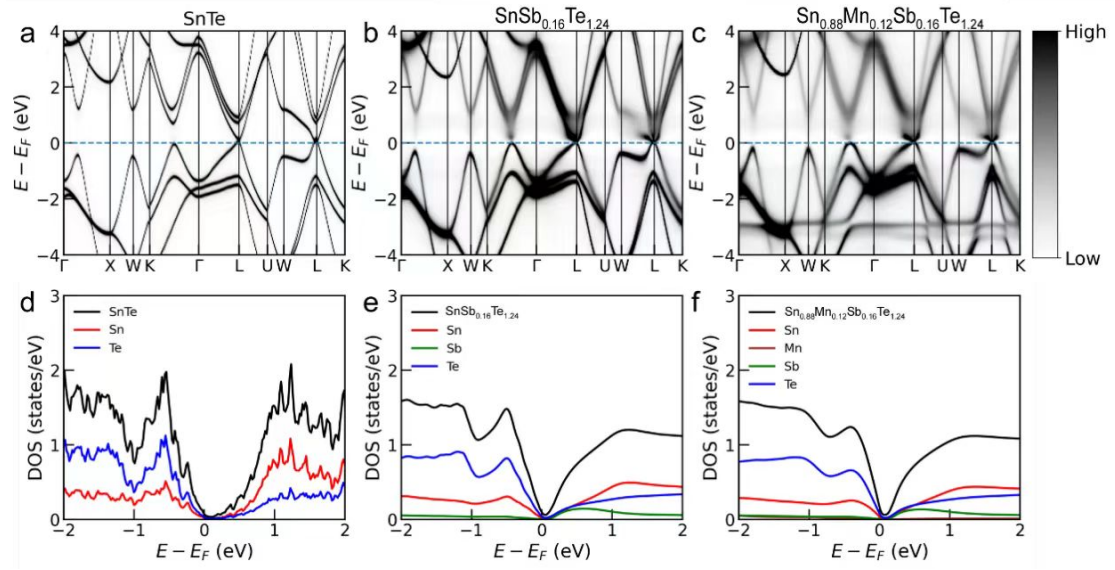

**Fig. S11** Band structures and projected density of states (DOS) for (a, d) SnTe, (b, e) SnSb<sub>0.16</sub>Te<sub>1.24</sub>, and (c, f) Sn<sub>0.88</sub>Mn<sub>0.12</sub>Sb<sub>0.16</sub>Te<sub>1.24</sub>, calculated using the KKR-CPA method.

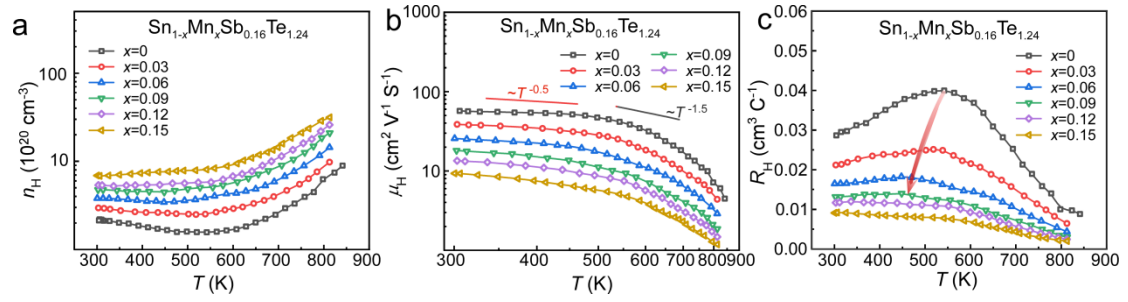

**Fig. S12** (a) Temperature-dependent Carrier concentration  $n_H$ , (b) Hall mobility  $\mu_H$  and (c) Hall coefficient  $R_H$  for  $\text{Sn}_{1-x}\text{Mn}_x\text{Sb}_{0.16}\text{Te}_{1.24}$  ( $x=0-0.15$ ) samples.

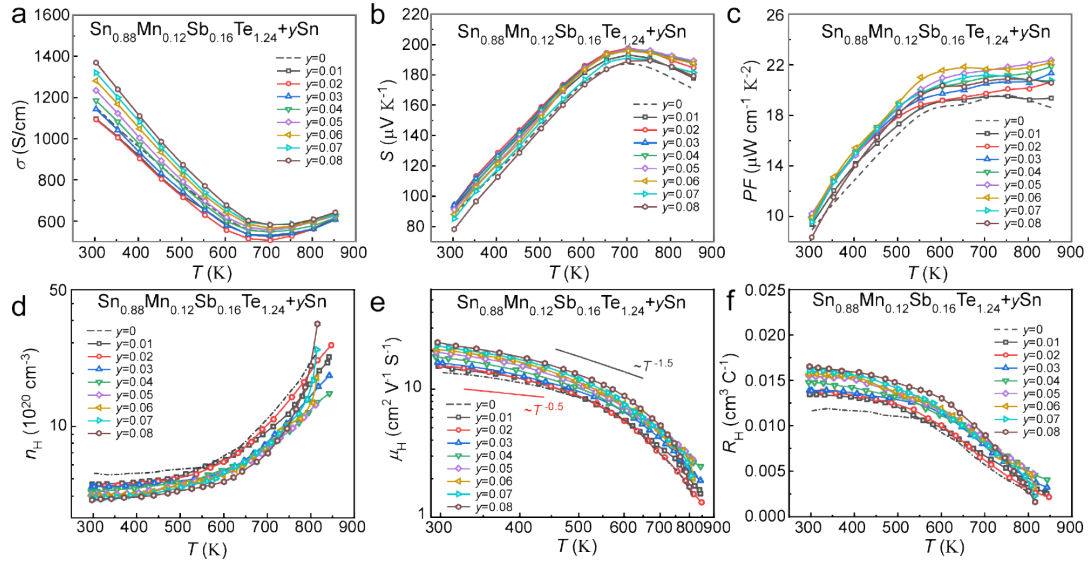

**Fig. S13** (a) Temperature-dependent electrical conductivity  $\sigma$ , (b) Seebeck coefficient  $S$ , (c) Power factor  $PF$ , (d) Carrier concentration  $n_H$ , (e) Hall mobility  $\mu_H$  and (f) Hall coefficient  $R_H$  for  $\text{Sn}_{0.88}\text{Mn}_{0.12}\text{Sb}_{0.16}\text{Te}_{1.24+y}\text{Sn}$  ( $y=0-0.08$ ) samples.



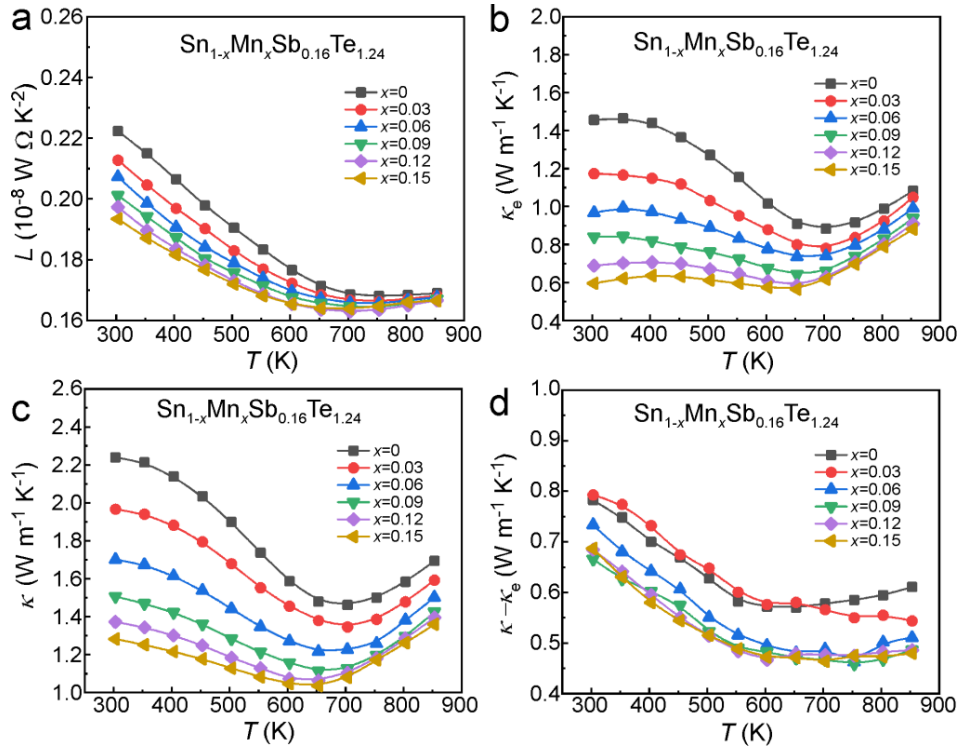

**Fig. S14** Temperature-dependent (a) Lorenz number  $L$ , (b) electronic thermal conductivity  $\kappa_e$ , (c) total thermal conductivity  $\kappa$ , and (d) lattice thermal conductivity  $\kappa_l$  for  $\text{Sn}_{1-x}\text{Mn}_x\text{Sb}_{0.16}\text{Te}_{1.24}$  ( $x=0$ -0.15) samples.

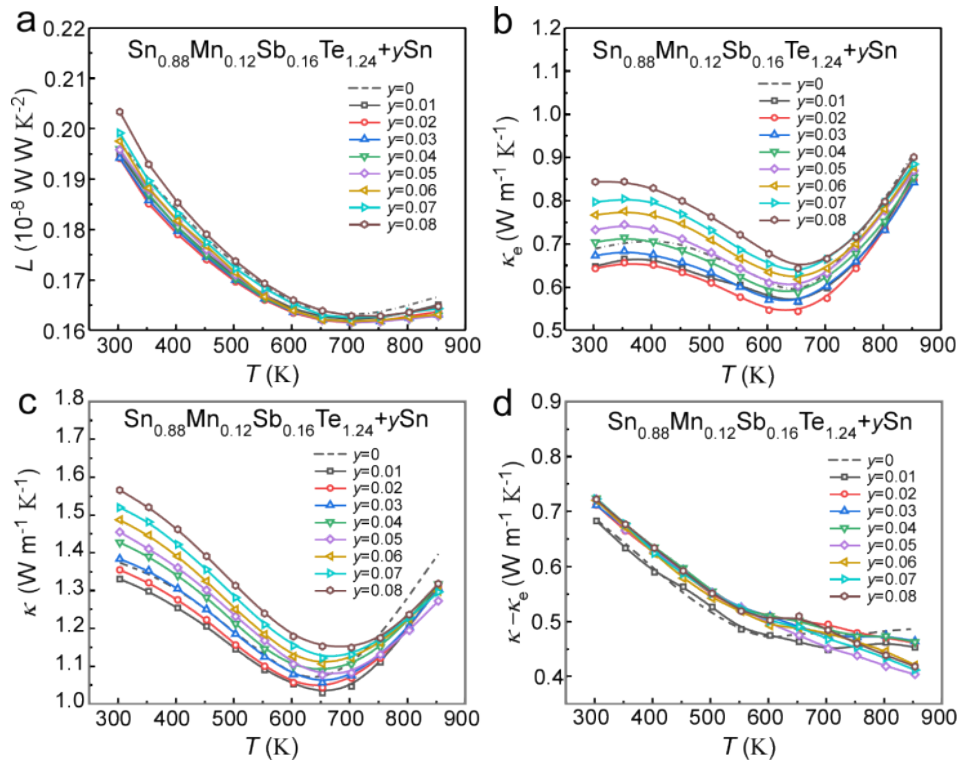

**Fig. S15** Temperature-dependent (a) Lorenz number  $L$ , (b) electronic thermal conductivity  $\kappa_e$ , (c) total thermal conductivity  $\kappa$ , and (d) lattice thermal conductivity  $\kappa_l$  for  $\text{Sn}_{0.88}\text{Mn}_{0.12}\text{Sb}_{0.16}\text{Te}_{1.24+y}\text{Sn}$  ( $y=0-0.08$ ) samples.

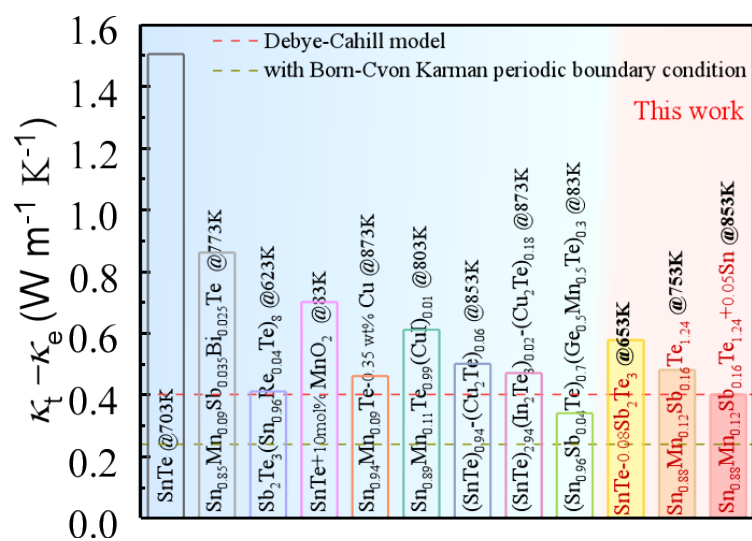

**Fig. S16** Comparison of the exceptionally low thermal conductivity  $\kappa_l$  in this work with previously reported SnTe materials.<sup>23-33</sup>

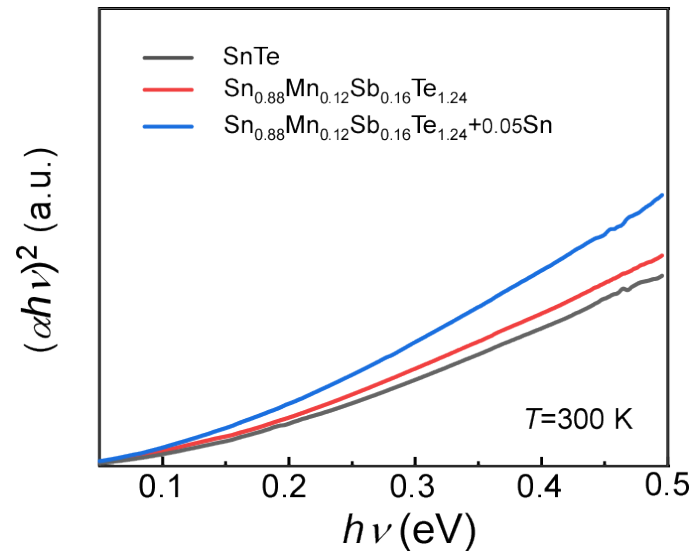

**Fig. S17** Infrared absorption spectra of SnTe,  $\text{Sn}_{0.88}\text{Mn}_{0.12}\text{Sb}_{0.16}\text{Te}_{1.24}$ , and  $\text{Sn}_{0.88}\text{Mn}_{0.12}\text{Sb}_{0.16}\text{Te}_{1.24}+0.05\text{Sn}$ .

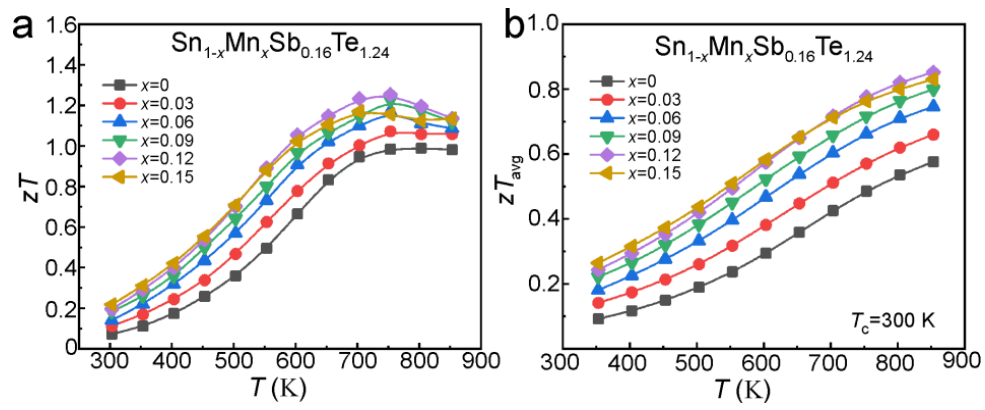

**Fig. S18** Temperature-dependent figure of merit (a)  $zT$  and (b) average  $zT_{\text{avg}}$  for  $\text{Sn}_{1-x}\text{Mn}_x\text{Sb}_{0.16}\text{Te}_{1.24}$  ( $x=0-0.15$ ) samples.

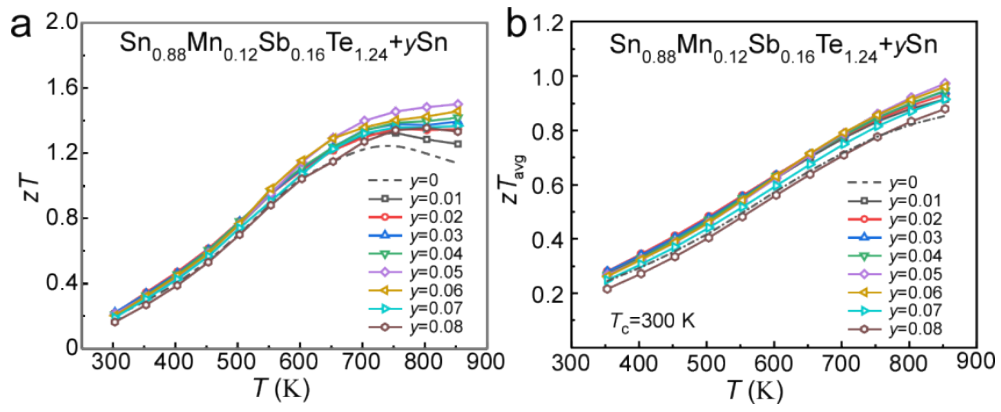

**Fig. S19** Temperature-dependent figure of merit (a)  $zT$  and (b) average  $zT_{\text{avg}}$  for  $\text{Sn}_{0.88}\text{Mn}_{0.12}\text{Sb}_{0.16}\text{Te}_{1.24+y}\text{Sn}$  ( $y=0-0.08$ ) samples.

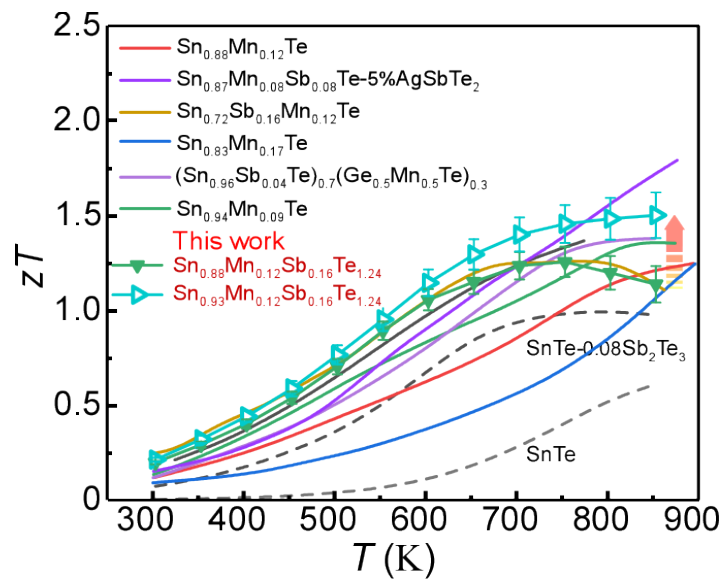

**Fig. S20** Temperature-dependent  $zT$  in comparison with other reported SnTe materials.<sup>29,31-33</sup>

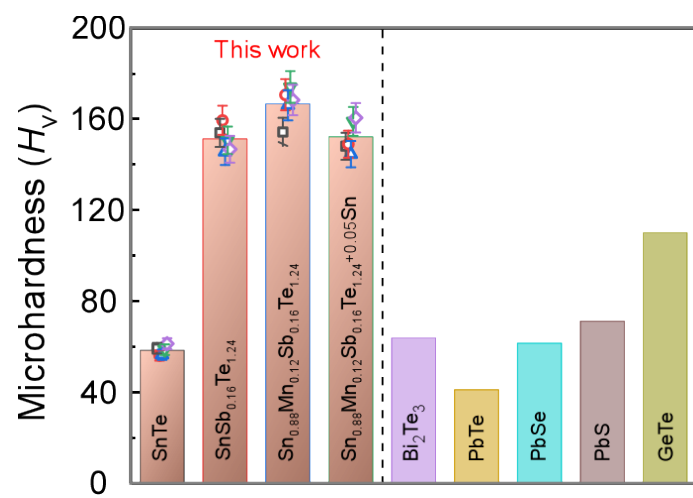

**Fig. S21** Vickers hardness  $H_V$  of this work and comparison with other common thermoelectric candidates.<sup>34</sup>



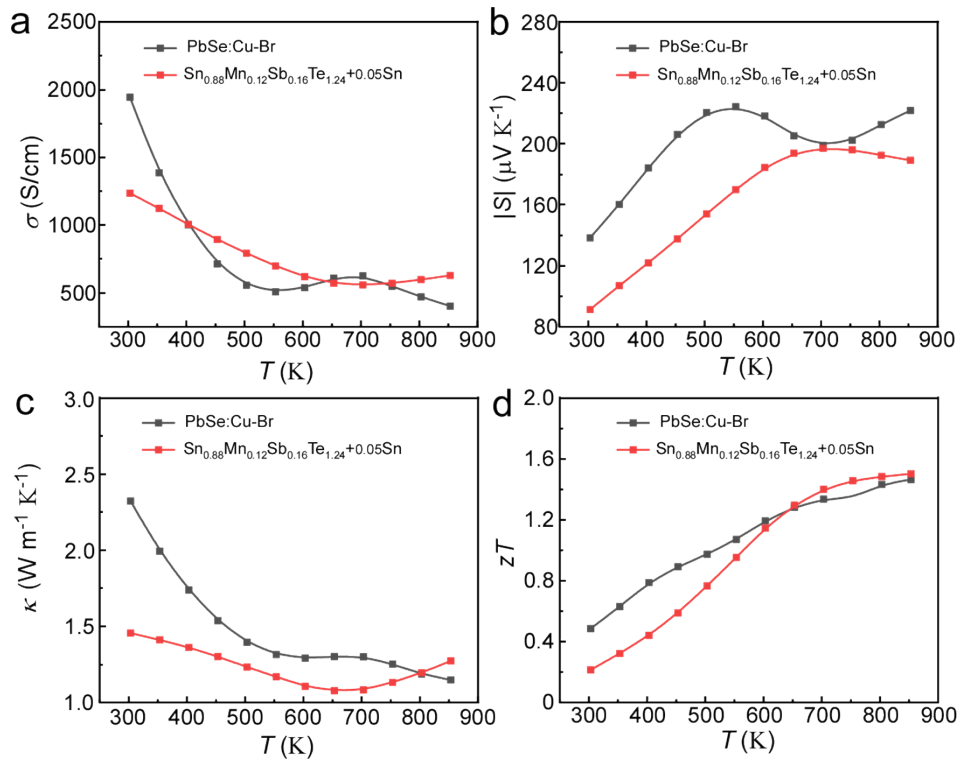

**Fig. S22** (a) Temperature-dependent electrical conductivity  $\sigma$ , (b) Seebeck coefficient  $S$ , (c) total thermal conductivity  $\kappa$ , and (d) thermoelectric figure of merit  $zT$  for *n*-type PbSe and *p*-type SnTe materials.

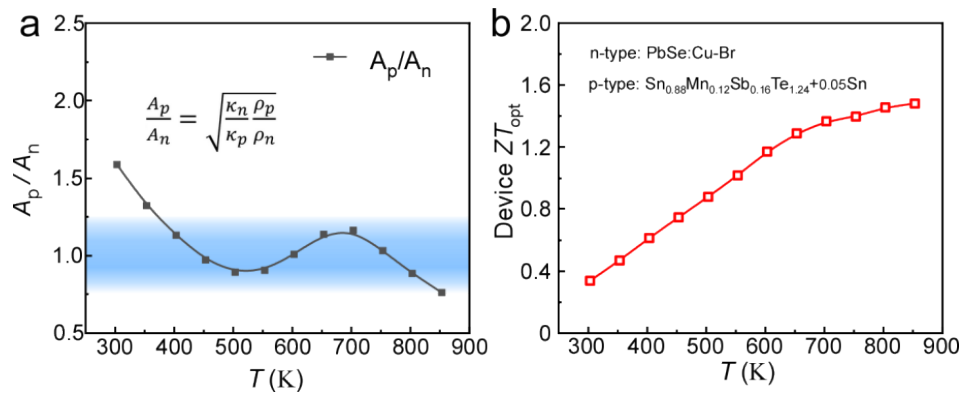

**Fig. S23** (a) Cross-sectional area ratio of the  $p/n$  legs at the same height, and (b) optimal device thermoelectric figure of merit  $ZT_{opt}$  as a function of temperature for SnTe-PbSe-based thermoelectric materials.

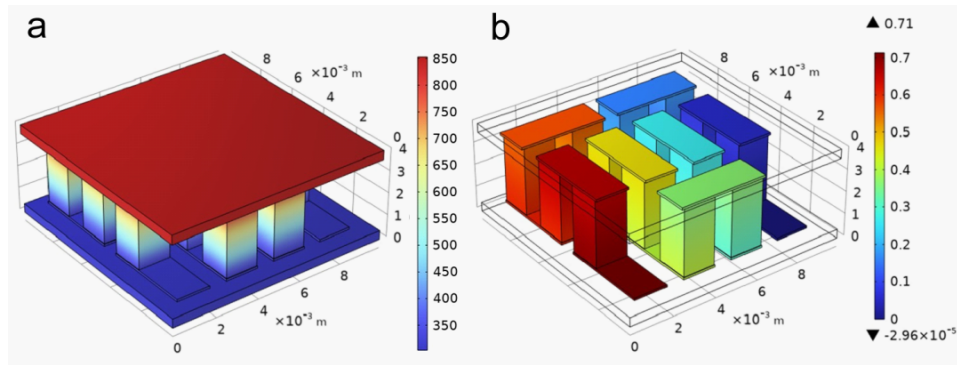

**Fig. S24** (a) Temperature profile and (b) closed circuit voltages  $V$  of 7 pairs of  $p$ -type SnTe and  $n$ -type PbSe-based thermoelectric modules simulated by COMSOL. The cold end temperature of the thermoelectric module is 300 K, and the hot end temperature is 850 K, respectively.

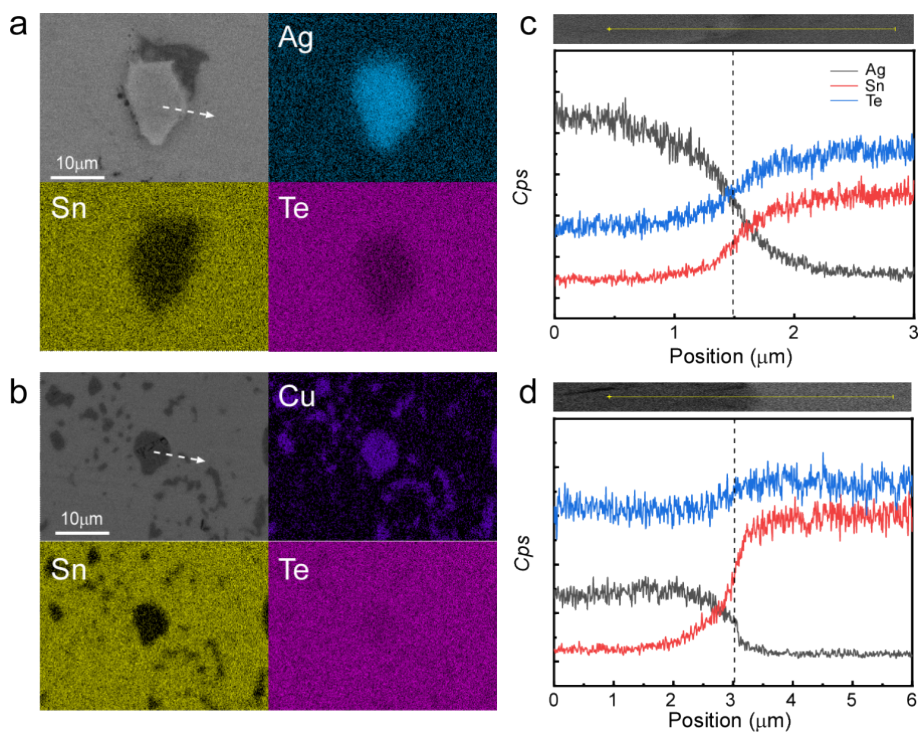

**Fig. S25** Typical SEM images and EDS spectra of (a, c) Ag/SnTe and (b, d) Cu/SnTe interfaces after vacuum annealing at 850 K for 72 hours, including surface and line scans.

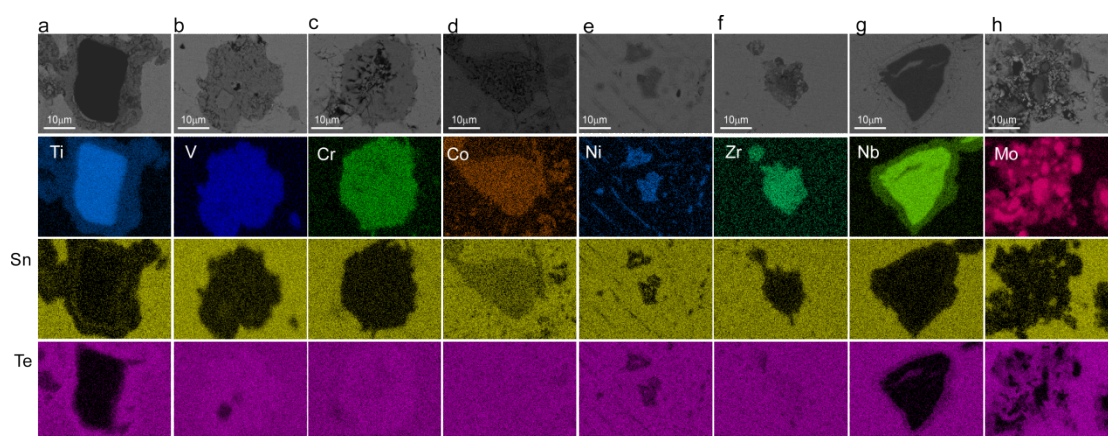

**Fig. S26** SEM images and EDS mapping results of the interfaces between SnTe and eight types of metals after aging at 850 K for 72 hours: (a) Ti, (b) V, (c) Cr, (d) Co, (e) Ni, (f) Zr, (g) Nb, and (h) Mo.

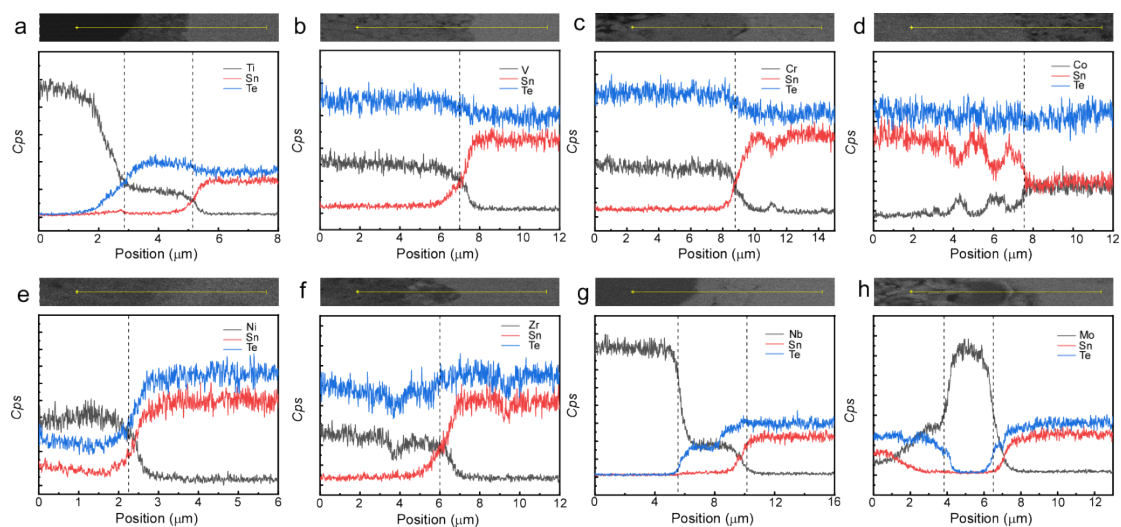

**Fig. S27** EDS line scanning (along the direction indicated by the yellow solid line) of the reaction interfaces in the SnTe matrix after aging at 850 K for 72 hours: (a) Ti, (b) V, (c) Cr, (d) Co, (e) Ni, (f) Zr, (g) Nb, and (h) Mo.

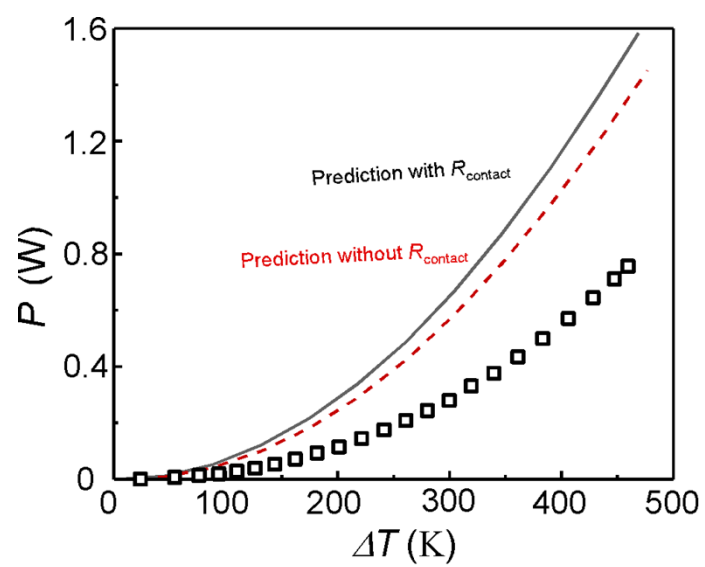

**Fig. S28** Maximum output power of the module as a function of the temperature difference for  $p$ -SnTe/ $n$ -PbSe thermoelectric modules, along with a comparison to theoretical predictions.

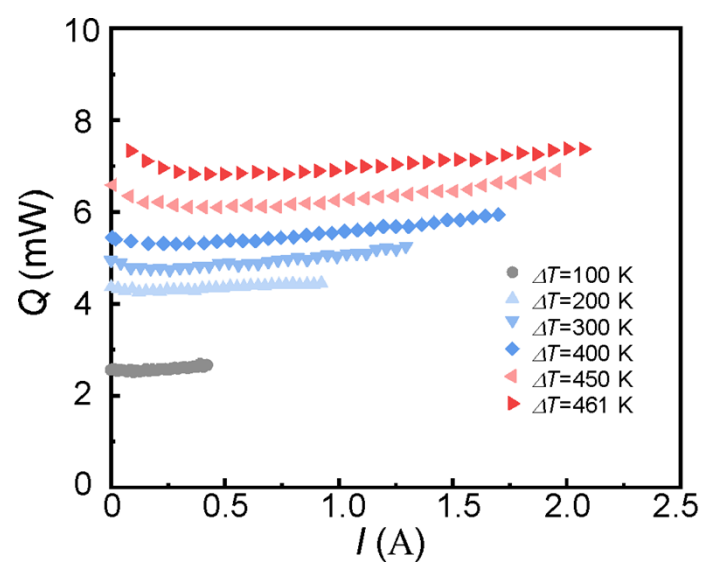

**Fig. S29** Heat flow of the *p*-SnTe/*n*-PbSe thermoelectric module as a function of loop current.



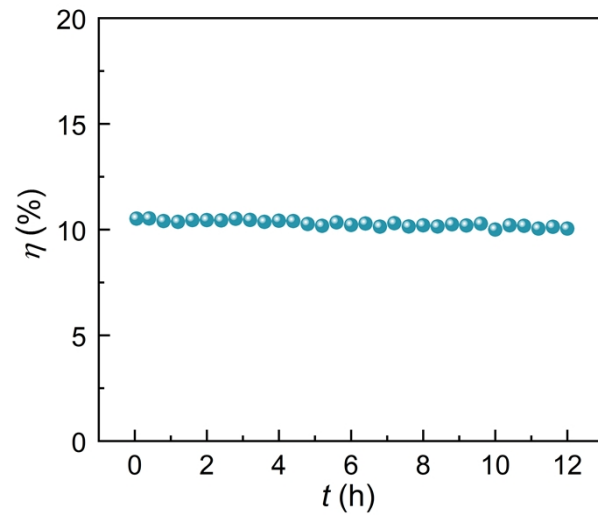

**Fig. S30** Continuous measurement of the SnTe-based module at a temperature difference ( $\Delta T$ ) of 461 K.

## Supplementary tables

**Table S1** Density of  $\text{Sn}_{0.88}\text{Mn}_{0.12}\text{Sb}_{0.16}\text{Te}_{1.24}$  and  $\text{Sn}_{0.88}\text{Mn}_{0.12}\text{Sb}_{0.16}\text{Te}_{1.24}+0.05\text{Sn}$  samples in this work.

| Composition                                                                      | Measured density<br>( $\text{g cm}^{-3}$ ) | Relative density<br>(%) |
|----------------------------------------------------------------------------------|--------------------------------------------|-------------------------|
| $\text{SnSb}_{0.16}\text{Te}_{1.24}$                                             | 6.257                                      | 97.491%                 |
| $\text{Sn}_{0.97}\text{Mn}_{0.03}\text{Sb}_{0.16}\text{Te}_{1.24}$               | 6.377                                      | 99.361%                 |
| $\text{Sn}_{0.94}\text{Mn}_{0.06}\text{Sb}_{0.16}\text{Te}_{1.24}$               | 6.370                                      | 99.252%                 |
| $\text{Sn}_{0.91}\text{Mn}_{0.09}\text{Sb}_{0.16}\text{Te}_{1.24}$               | 6.331                                      | 98.644%                 |
| $\text{Sn}_{0.88}\text{Mn}_{0.12}\text{Sb}_{0.16}\text{Te}_{1.24}$               | 6.33                                       | 98.629%                 |
| $\text{Sn}_{0.85}\text{Mn}_{0.15}\text{Sb}_{0.16}\text{Te}_{1.24}$               | 6.256                                      | 97.476%                 |
| $\text{Sn}_{0.88}\text{Mn}_{0.12}\text{Sb}_{0.16}\text{Te}_{1.24}+0.01\text{Sn}$ | 6.252                                      | 97.414%                 |
| $\text{Sn}_{0.88}\text{Mn}_{0.12}\text{Sb}_{0.16}\text{Te}_{1.24}+0.02\text{Sn}$ | 6.221                                      | 96.931%                 |
| $\text{Sn}_{0.88}\text{Mn}_{0.12}\text{Sb}_{0.16}\text{Te}_{1.24}+0.03\text{Sn}$ | 6.240                                      | 97.227%                 |
| $\text{Sn}_{0.88}\text{Mn}_{0.12}\text{Sb}_{0.16}\text{Te}_{1.24}+0.04\text{Sn}$ | 6.241                                      | 97.242%                 |
| $\text{Sn}_{0.88}\text{Mn}_{0.12}\text{Sb}_{0.16}\text{Te}_{1.24}+0.05\text{Sn}$ | 6.230                                      | 97.071%                 |
| $\text{Sn}_{0.88}\text{Mn}_{0.12}\text{Sb}_{0.16}\text{Te}_{1.24}+0.06\text{Sn}$ | 6.231                                      | 97.086%                 |
| $\text{Sn}_{0.88}\text{Mn}_{0.12}\text{Sb}_{0.16}\text{Te}_{1.24}+0.07\text{Sn}$ | 6.230                                      | 97.071%                 |
| $\text{Sn}_{0.88}\text{Mn}_{0.12}\text{Sb}_{0.16}\text{Te}_{1.24}+0.08\text{Sn}$ | 6.251                                      | 97.398%                 |

**Table S2** Parameters used to calculate carrier transport of SnTe based on the two band model.

| Parameters                                                             | Values                                     |
|------------------------------------------------------------------------|--------------------------------------------|
| Combination of elastic constants $C_1$ (Pa)                            | $5.8 \times 10^{10}$                       |
| Ratio of the longitudinal to transverse band effective mass $K_L$      | $4^4$                                      |
| Ratio of the longitudinal to transverse band effective mass $K_\Sigma$ | $1^4$                                      |
| Band gap $E_g$ (eV)                                                    | $0.054 + 4.2 \times 10^{-4} \times T^{35}$ |
| Energy offset $\Delta E$ (eV)                                          | $0.45 - 2.5 \times 10^{-4} \times T^8$     |
| Band effective mass of $V_L m_b^*$ ( $m_0$ )                           | $e^{lg 0.17 + 0.51 lg \frac{T}{300}}$      |
| Band effective mass of $V_\Sigma m_b^*$ ( $m_0$ )                      | 1.92                                       |
| Deformation potential of $V_L E_{def}$ (eV)                            | 35 (this work)                             |
| Deformation potential of $V_\Sigma E_{def}$ (eV)                       | 25 (this work)                             |
| Light valence Band degeneracy $N_L$                                    | 4                                          |
| heavy valence Band degeneracy $N_\Sigma$                               | 15                                         |

**Table S3** Parameters adopted in the Debye-Callaway model simulation.

| Parameters                                                                            | Values                  |
|---------------------------------------------------------------------------------------|-------------------------|
| Longitudinal sound velocity $u_L$ (m s <sup>-1</sup> )                                | 3171 <sup>36</sup>      |
| Transverse sound velocity $u_T$ (m s <sup>-1</sup> )                                  | 1220 <sup>36</sup>      |
| Sound velocity $v$ (m s <sup>-1</sup> )                                               | 1967                    |
| Atomic mass Sn (kg)                                                                   | $1.97 \times 10^{-25}$  |
| Atomic mass Te (kg)                                                                   | $2.12 \times 10^{-25}$  |
| Atomic mass Sb (kg)                                                                   | $2.02 \times 10^{-25}$  |
| Atomic mass Mn (kg)                                                                   | $9.13 \times 10^{-26}$  |
| Atomic mass vacancy (kg)                                                              | 0                       |
| Ionic radius Sn (Å)                                                                   | 0.93                    |
| Ionic radius Te (Å)                                                                   | 2.11                    |
| Ionic radius Sb (Å)                                                                   | 0.76                    |
| Ionic radius Mn (Å)                                                                   | 0.81                    |
| Ionic radius vacancy (Å)                                                              | 50%<br>$r_{Sn^{2+}}$    |
| Grüneisen parameter $\gamma$                                                          | 2.2 <sup>19,37,38</sup> |
| Point defect scattering parameters $\Gamma$                                           | (fitted)                |
| Temperature-dependent ratio of normal phonon scattering to Umklapp scattering $\beta$ | 2.3 (fitted)            |

**Table S4** Physical and chemical properties of Ti, V, Cr, Co, Ni, Zr, Nb, and Mo.

| Metal                                                      | Ti                  | V     | Cr   | Co                   | Ni                   | Zr                   | Nb                  | Mo   |
|------------------------------------------------------------|---------------------|-------|------|----------------------|----------------------|----------------------|---------------------|------|
| Melting point (°C)                                         | 1668                | 1910  | 1907 | 1495                 | 1455                 | 1855                 | 2477                | 2623 |
| Resistivity ( $\Omega\cdot\text{m}$ )                      | $6.5\times 10^{-7}$ | 20.45 | 12.9 | $6.24\times 10^{-8}$ | $6.84\times 10^{-6}$ | $1.25\times 10^{-7}$ | $1.6\times 10^{-7}$ | 5.6  |
| Thermal conductivity ( $\text{Wm}^{-1}\text{K}^{-1}$ )     | 14.63               | 0.307 | 0.94 | 0.01                 | 90                   | 16.5                 | 0.537               | 138  |
| Coefficient of expansion ( $\times 10^{-6}\text{K}^{-1}$ ) | 10.8                | 4.8   | 6.2  | 6.8                  | 13                   | 3.6                  | 4.1                 | 5.2  |

## References:

1. R. Blachnik and R. Igel, *Z. Naturforsch. B*, 1974, **29**, 625-629.
2. Y. Pei, X. Shi, A. LaLonde, H. Wang, L. Chen and G. J. Snyder, *Nature*, 2011, **473**, 66-69.
3. H.-S. Kim, Z. M. Gibbs, Y. Tang, H. Wang and G. J. Snyder, *APL Mater.*, 2015, **3**, 041506.
4. M. Hong, Y. Wang, S. Xu, X. Shi, L. Chen, J. Zou and Z.-G. Chen, *Nano Energy*, 2019, **60**, 1-7.
5. W. H. Butler, *Phys. Rev. B*, 1985, **31**, 3260-3277.
6. H. Akai, *Journal of Physics-Condensed Matter*, 1989, **1**, 8045-8063.
7. V. L. Moruzzi, J. F. Janak and A. R. Williams, *Calculated electronic properties of metals*, 1978.
8. M. Zhou, Z. M. Gibbs, H. Wang, Y. Han, C. Xin, L. Li and G. J. Snyder, *Phys. Chem. Chem. Phys.*, 2014, **16**, 20741-20748.
9. Y. Xiao, H. Wu, W. Li, M. Yin, Y. Pei, Y. Zhang, L. Fu, Y. Chen, S. J. Pennycook, L. Huang, J. He and L.-D. Zhao, *J. Am. Chem. Soc.*, 2017, **139**, 18732-18738.
10. T. Seddon and S. C. Gupta, *Solid State Commun.*, 1976, **20**, 69-72.
11. C. Herring and E. Vogt, *Phys. Rev.*, 1956, **101**, 944-961.
12. Y. Pei, Z. M. Gibbs, A. Gloskovskii, B. Balke, W. G. Zeier and G. J. Snyder, *Adv. Energy Mater.*, 2014, **4**, 1400486.
13. Q. Zhang, B. Liao, Y. Lan, K. Lukas, W. Liu, K. Esfarjani, C. Opeil, D. Broido, G. Chen and Z. Ren, *Proc. Natl. Acad. Sci. U. S. A.*, 2013, **110**, 13261-13266.
14. Y. Pei, A. D. LaLonde, H. Wang and G. J. Snyder, *Energy Environ. Sci.*, 2012, **5**, 7963-6969.
15. L. M. Rogers, *J. Phys. D: Appl. Phys.*, 1968, **1**, 845-852.
16. J. Callaway and H. C. von Baeyer, *Phys. Rev.*, 1960, **120**, 1149-1154.
17. D. Bessas, I. Sergueev, H. C. Wille, J. Perßon, D. Ebling and R. P. Hermann, *Phys. Rev. B*, 2012, **86**.
18. J. Callaway, *Phys. Rev.*, 1959, **113**, 1046-1051.
19. H. Wang, T. Wang, J. Hwang, W. Su, H. Kim, J. Zhai, X. Wang, C. Wang and W.

- Kim, *Inorg. Chem. Front.*, 2018, **5**, 793-801.
20. G. A. Slack, *Phys. Rev.*, 1957, **105**, 829-831.
21. B. Abeles, *Phys. Rev.*, 1963, **131**, 1906-1911.
22. Z. Bu, X. Zhang, Y. Hu, Z. Chen, S. Lin, W. Li, C. Xiao and Y. Pei, *Nat. Commun.*, 2022, **13**, 237.
23. S. K. Kihoi, H. Kim, H. Jeong, H. Kim, J. Ryu, S. Yi and H. S. Lee, *J. Alloys Compd.*, 2019, **806**, 361-369.
24. X. Xu, J. Cui, Y. Yu, B. Zhu, Y. Huang, L. Xie, D. Wu and J. He, *Energy Environ. Sci.*, 2020, **13**, 5135-5142.
25. Z. Zhou, J. Yang, Q. Jiang, J. Xin, S. Li, X. Wang, X. Lin, R. Chen, A. Basit and Q. Chen, *Chem. Mater.*, 2019, **31**, 3491-3497.
26. Z. Wang, L. Ding, L. Liu, Z. Tan, H. Pan, P. Jiang, W. Wu and Y. Yu, *Scr. Mater.*, 2023, DOI: 10.1016/j.scriptamat.2023.115315, 115315.
27. G. Wu, Z. Guo, Q. Zhang, X. Wang, L. Chen, X. Tan, P. Sun, G.-Q. Liu, B. Yu and J. Jiang, *J. Mater. Chem. A*, 2021, **9**, 13065-13070.
28. J. Tang, B. Gao, S. Lin, J. Li, Z. Chen, F. Xiong, W. Li, Y. Chen and Y. Pei, *Adv. Funct. Mater.*, 2018, **28**, 1803586-1803593.
29. Q. Zhang, R. Wang, K. Song, X. Tan, H. Hu, Z. Guo, G. Wu, P. Sun, G.-Q. Liu and J. Jiang, *Nano Energy*, 2022, **94**, 106940.
30. F. Guo, B. Cui, H. Geng, Y. Zhang, H. Wu, Q. Zhang, B. Yu, S. J. Pennycook, W. Cai and J. Sui, *Small*, 2019, **15**, e1902493.
31. G. Tan, F. Shi, S. Hao, H. Chi, T. P. Bailey, L. D. Zhao, C. Uher, C. Wolverton, V. P. Dravid and M. G. Kanatzidis, *J. Am. Chem. Soc.*, 2015, **137**, 11507-11522.
32. Y. Liu, X. Zhang, P. Nan, B. Zou, Q. Zhang, Y. Hou, S. Li, Y. Gong, Q. Liu, B. Ge, O. Cojocar-Mirédin, Y. Yu, Y. Zhang, G. Chen, M. Wuttig and G. Tang, *Adv. Funct. Mater.*, 2022, **32**, 2209980.
33. X. Yan, S. Zheng, Z. Zhou, H. Wu, B. Zhang, Y. Huang, X. Lu, G. Han, G. Wang and X. Zhou, *Nano Energy*, 2021, **84**, 105879.
34. Q. Zhang, Z. Guo, R. Wang, X. Tan, K. Song, P. Sun, H. Hu, C. Cui, G. Q. Liu and J. Jiang, *Adv. Funct. Mater.*, 2022, **32**, 2205458.

35. G. Tan, L.-D. Zhao, F. Shi, J. W. Doak, S. H. Lo, H. Sun, C. Wolverton, V. P. Dravid, C. Uher and M. G. Kanatzidis, *J. Am. Chem. Soc.*, 2014, **136**, 7006-7017.
36. R. Moshwan, W. Liu, X. Shi, Y. Wang, J. Zou and Z.-G. Chen, *Nano Energy*, 2019, **65**, 104056.
37. R. Al Rahal Al Orabi, N. A. Mecholsky, J. Hwang, W. Kim, J.-S. Rhyee, D. Wee and M. Fornari, *Chem. Mater.*, 2015, **28**, 376-384.
38. C. Toher, J. J. Plata, O. Levy, M. de Jong, M. Asta, M. B. Nardelli and S. Curtarolo, *Phys. Rev. B*, 2014, **90**, 174107.
